# Supplementary material
Source: publisher site journal article supplement (https://www.dovepress.com/article/437926)
Supplement: Supplementary file 1 [file get_supplementary_file.php]

**Plasma thrombomodulin as a biomarker for the diagnosis and prognosis of HBV-related acute-on-chronic liver failure**

Xingping Zhou, Jinjin Luo, Xi Liang, Peng Li, Keke Ren, Jiaojiao Xin, Jing Jiang, Jiaxian Chen, Lulu He, Hui Yang, Shiwen Ma, Bingqi Li, Dongyan Shi, Jun Li.

**Supplementary Materials**


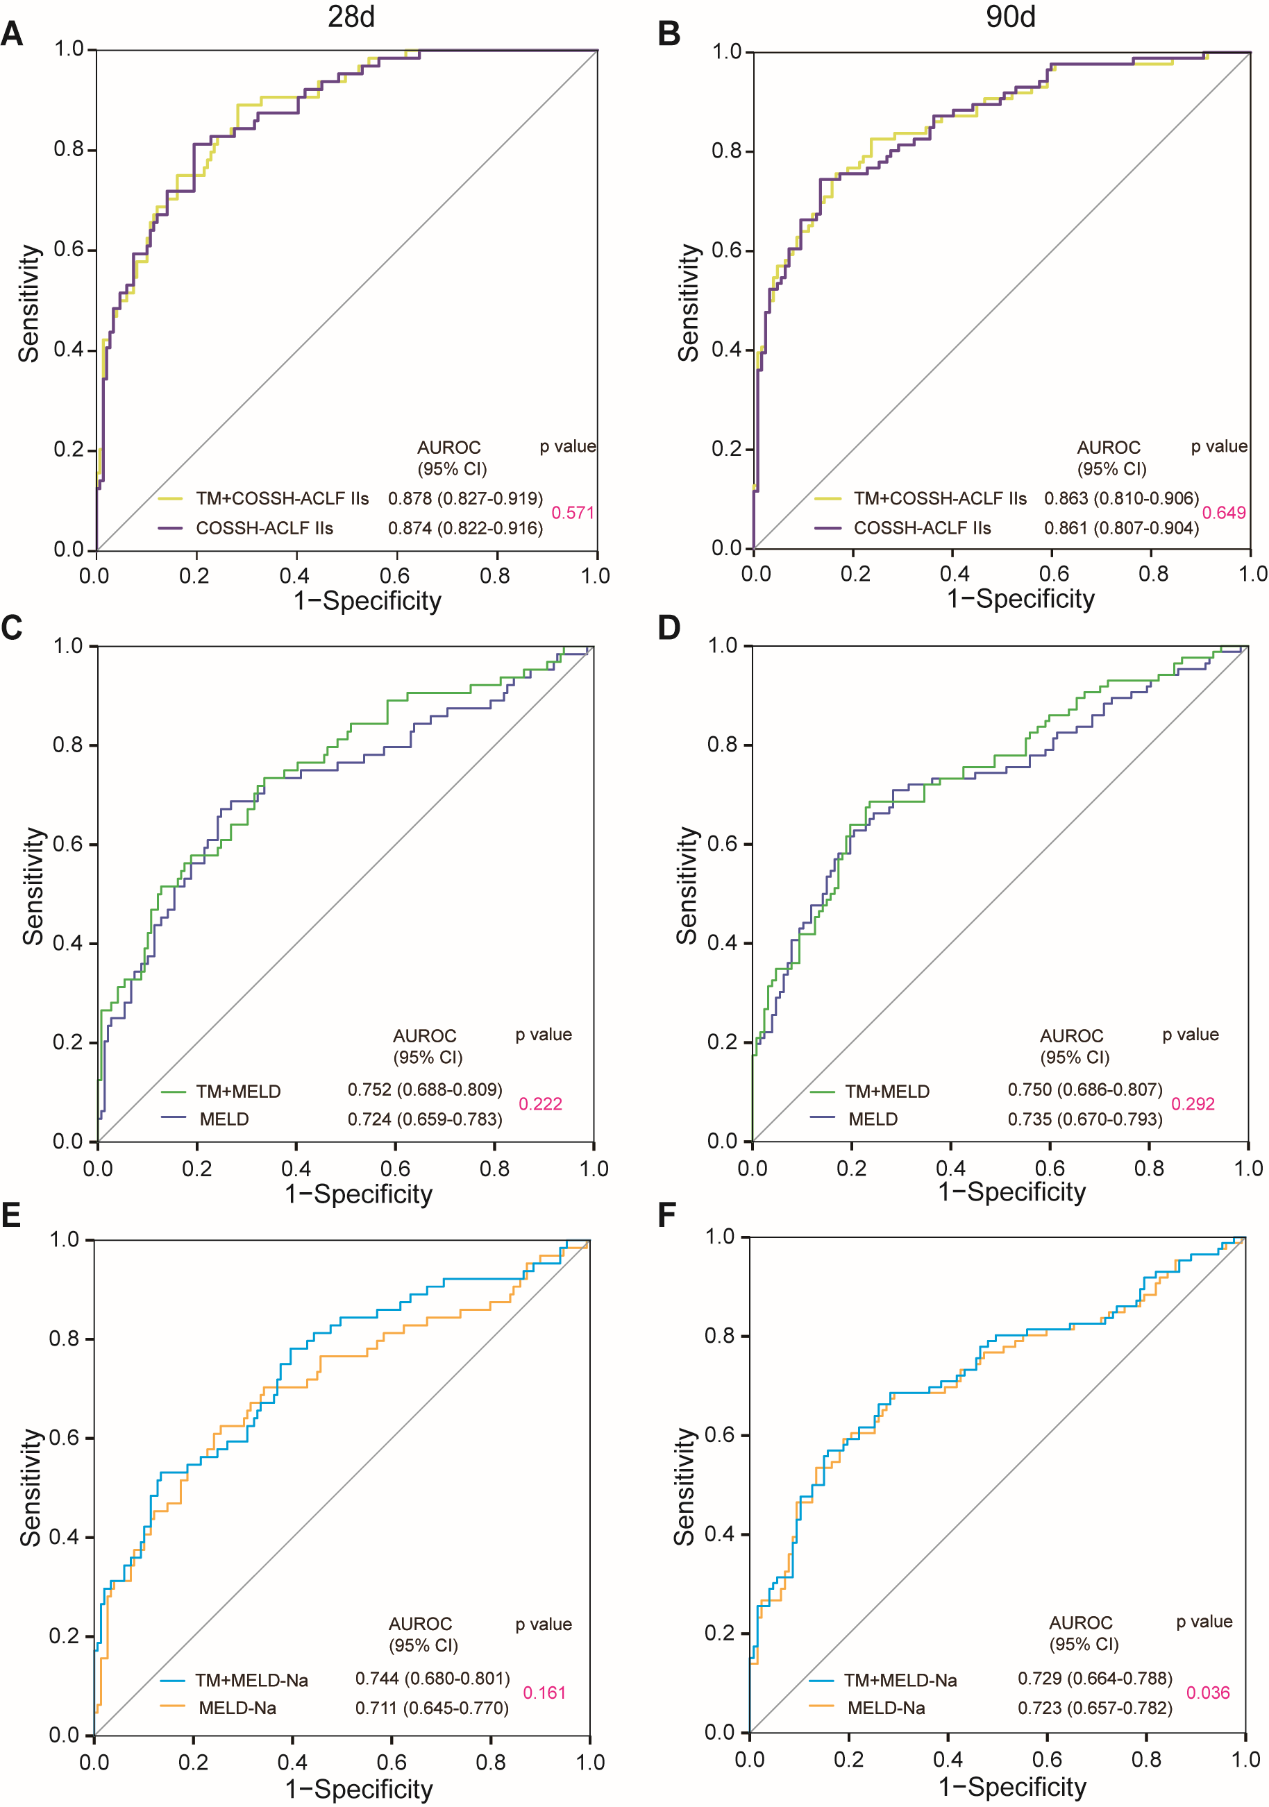


**Supplementary Figure 1. Improvement in prognostic accuracy of prognostic scores with the addition of plasma TM concentrations for predicting the 28-day and 90-day mortality rates of patients with HBV-ACLF. (A)** COSSH-ACLF IIs for the 28-day mortality rates. **(B)** COSSH-ACLF IIs for the 90-day mortality rates. **(C)** MELD score for the 28-day mortality rates. **(D)** MELD score for the 90-day mortality rates. **(E)** MELD-Na score for the 28-day mortality rates. **(F)** MELD-Na score for the 90-day mortality rates.TM, thrombomodulin; COSSH-ACLF IIs, Chinese Group on the Study of Severe Hepatitis B-ACLF II score; MELD, Model for End-stage Liver Disease; MELD-Na, MELD-sodium; AUROC, area under the receiver operating characteristic.
